# Supplementary material for: Diagnostic and Prognostic Roles of C-Reactive Protein, Procalcitonin, and Presepsin in Acute Kidney Injury Patients Initiating Continuous Renal Replacement Therapy
Source: MDPI journal article supplement (doi:10.3390/diagnostics13040777), 2023-02-18
Supplement: s1 [file s1]

|                                   | <b>Total septic patients<br/>(n=90)</b> | <b>30day-Survivor<br/>(n=28)</b> | <b>30day-non-survivor<br/>(n=62)</b> | <b>p-value</b> |
|-----------------------------------|-----------------------------------------|----------------------------------|--------------------------------------|----------------|
| Age, y                            | 70.56 (39-97)                           | 67.85 (39-97)                    | 71.79 (42-93)                        | 0.105          |
| Male, n(%)                        | 64 (71.1%)                              | 18 (64.3%)                       | 46 (74.2%)                           | 0.337          |
| Positive blood culture            | 39 (43.3%)                              | 11 (39.3%)                       | 28 (45.2%)                           | 0.603          |
| DM                                | 31 (34.4%)                              | 10 (35.7%)                       | 21 (33.9%)                           | 0.865          |
| HTN                               | 39 (43.3%)                              | 10 (35.7%)                       | 29 (46.8%)                           | 0.327          |
| HF                                | 12 (13.3%)                              | 5 (17.9%)                        | 7 (11.3%)                            | 0.396          |
| IHD                               | 6 (6.7%)                                | 1 (3.6%)                         | 5 (8.1%)                             | 0.429          |
| AF                                | 14 (15.6%)                              | 3 (10.7%)                        | 11 (17.7%)                           | 0.394          |
| CI                                | 22 (24.4%)                              | 8 (28.6%)                        | 14 (22.6%)                           | 0.540          |
| COPD                              | 4 (4.4%)                                | 1 (3.6%)                         | 3 (4.8%)                             | 0.787          |
| LC                                | 7 (7.8%)                                | 0 (0%)                           | 7 (11.3%)                            | 0.064          |
| CKD                               | 24 (26.7%)                              | 9 (32.1%)                        | 15 (24.2%)                           | 0.430          |
| Malignancy                        | 27 (30%)                                | 9 (32.1%)                        | 18 (29.0%)                           | 0.766          |
| Hb (g/dL)                         | 9.49 (3.80-15.10)                       | 9.79 (6.60-13.40)                | 9.36 (3.8-15.10)                     | 0.236          |
| Albumin (g/dL)                    | 2.63 (1.7-4.10)                         | 2.81 (2.0-4.10)                  | 2.55 (1.7-3.5)                       | 0.031          |
| Cr (mg/dL)                        | 2.77 (0.43-22)                          | 3.16 (0.82-10.90)                | 2.60 (0.43-22)                       | 0.063          |
| eGFR (mL/min/1.73m <sup>2</sup> ) | 31.99 (2.00-93)                         | 24.88 (6.0 -68)                  | 35.20 (2-93)                         | 0.055          |
| Phosphate(mg/d)                   | 5.20 (1.40-16)                          | 4.82 (1.6-12.6)                  | 5.37 (1.4-16)                        | 0.280          |
| Potassium(mEq/L)                  | 4.48 (2.2-9.0)                          | 4.48 (2.64-8.30)                 | 4.48 (2.20-9.00)                     | 0.610          |
| Total Ca(mg/dL)                   | 7.32 (5.50.-9.40)                       | 7.48 (5.5-8.6)                   | 7.25 (5.50-9.40)                     | 0.115          |
| WBC (x10 <sup>9</sup> /L)         | 12614 (10-55770)                        | 14792 (300-43230)                | 11630 (10-55770)                     | 0.376          |
| PLT (x10 <sup>3</sup> /uL)        | 110 (5-471)                             | 151.92 (5-395)                   | 92.38 (9-471)                        | 0.008          |
| CRP (mg/dL)                       | 19.48 (0.8-40)                          | 16.67 (1.2-38)                   | 20.75 (0.80-40)                      | 0.099          |
| Presepsin (pg/mL)                 | 3204.86 (386-20000)                     | 3733.96 (386-14124)              | 2965.91 (389-20000)                  | 0.480          |
| Procalcitonin (ng/mL)             | 51.04 (0.57-200)                        | 42.17 (0.57-200)                 | 55.05 (0.62-200)                     | 0.145          |
| SOFA score                        | 12.1 (4-19)                             | 10.21 (4-19)                     | 12.95 (7-19)                         | 0.001          |
| Lactate (mmol/L)                  | 5.56 (0.70-20)                          | 3.84 (0.70-11)                   | 6.34 (1.3-20)                        | 0.002          |

Supplement Table S1. Baseline characteristics of 30day-survivor and 30day-non-survivor

| marker        | Cut-off value | Sensitivity (%) | Specificity (%) |
|---------------|---------------|-----------------|-----------------|
| Presepsin     | 693 (pg/mL)   | 0.928           | 0.190           |
| Procalcitonin | 3.00 (ng/mL)  | 0.826           | 0.429           |
| CRP           | 31 (mg/dL)    | 0.188           | 1.000           |

Supplement Table S2. Diagnostic test of inflammatory marker for death

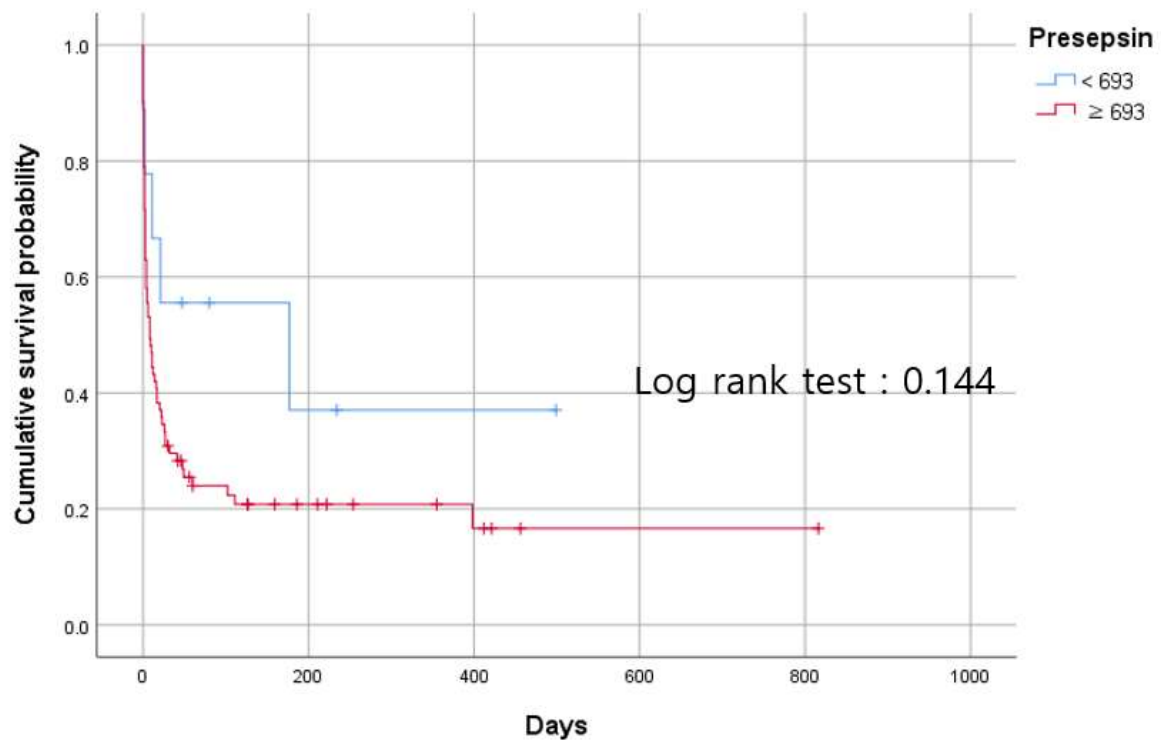

Supplement Figure S1. Kaplan-Meier analysis of all-cause mortality of presepsin in septic CRRT patients and log-rank test.

|                        | <b>Univariate HR (95% CI)</b> | <b>P value</b> |
|------------------------|-------------------------------|----------------|
| Diabetes mellitus      | 0.826 (0.502-1.358)           | 0.450          |
| Hypertension           | 0.994 (0.616-1.603)           | 0.980          |
| Heart failure          | 0.687 (0.328-1.438)           | 0.319          |
| Ischemic heart disease | 1.251 (0.540-2.897)           | 0.601          |
| Atrial fibrillation    | 0.987 (0.516-1.888)           | 0.969          |
| Cerebral Ischemia      | 0.658 (0.371-1.167)           | 0.152          |
| COPD                   | 1.252 (0.392-3.997)           | 0.704          |
| Liver cirrhosis        | 1.881 (0.854-4.144)           | 0.117          |
| Chronic kidney disease | 0.681(0.393-1.180)            | 0.170          |
| Malignancy             | 1.089 (0.654-1.811)           | 0.744          |

COPD; Chronic obstructive pulmonary disease

Supplement Table S3. Underlying disease associated with all-cause mortality by Cox proportional hazard analysis.
